# Supplementary material for: Temperature-dependent supramolecular isomers of a tetranuclear macrocycle and a zigzag chain based on dicopper building blocks
Source: Royal Society of Chemistry journal article supplement (doi:10.1039/c1ce05370a), 2011-01-01
Supplement: c1ce05370a.pdf [file c1ce05370a.pdf]

*Electronic Supplementary Information*

*For*

Temperature-dependent supramolecular isomers of a  
tetranuclear macrocycle and a zigzag chain based on  
dicopper building blocks

Jin-Ji Wu,<sup>†</sup> Wei Xue,<sup>†</sup> Man-Li Cao,<sup>‡,\*</sup> Zheng-Ping Qiao<sup>†</sup> and Bao-Hui Ye<sup>†,\*</sup>

<sup>†</sup> MOE Key Laboratory of Bioinorganic and Synthetic Chemistry, School of Chemistry and Chemical  
Engineering, Sun Yat-Sen University, Guangzhou 510275, China and

<sup>‡</sup> Department of Chemistry, Guangdong University of Education, Guangzhou 510303, China

E-mail: cesybh@mail.sysu.edu.cn (B.-H. Ye)

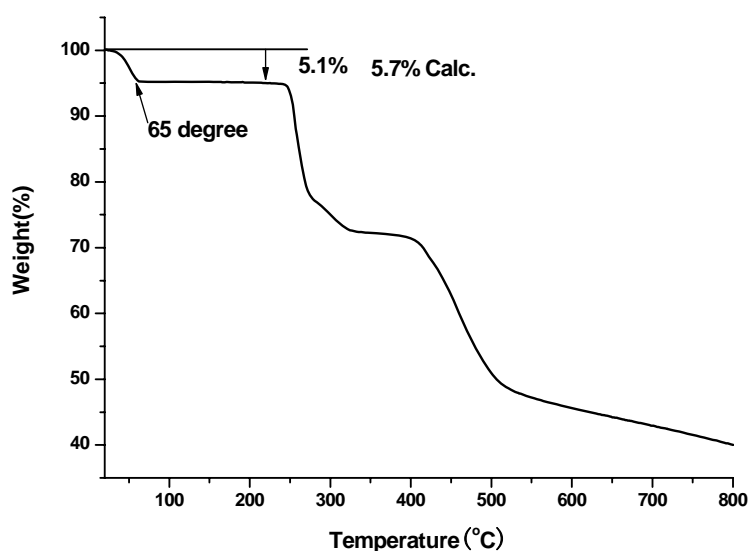

**Figure S1.** TGA curve of complex 2.

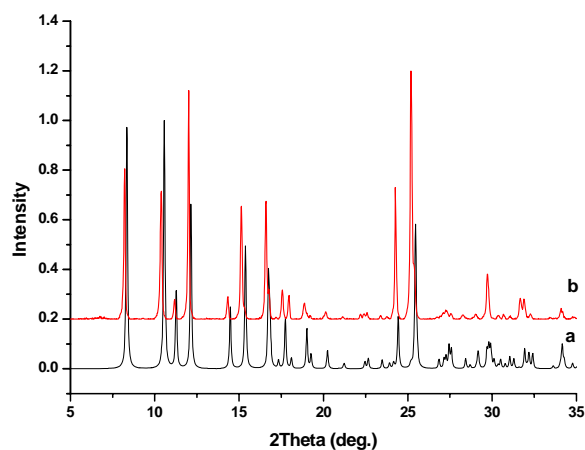

**Figure S2.** Powder XRD pattern of the simulation based on the single-crystal analysis **1** (a) and as-synthesized **1** (b).

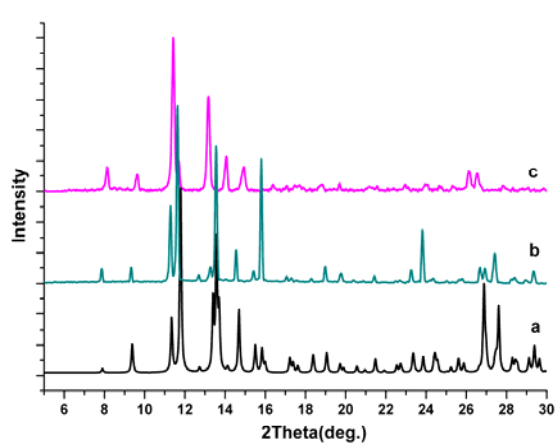

**Figure S3.** Powder XRD pattern of the simulation based on the single-crystal analysis (a), as-synthesized sample (b) and the sample heat at 200 °C (c) of **2**.

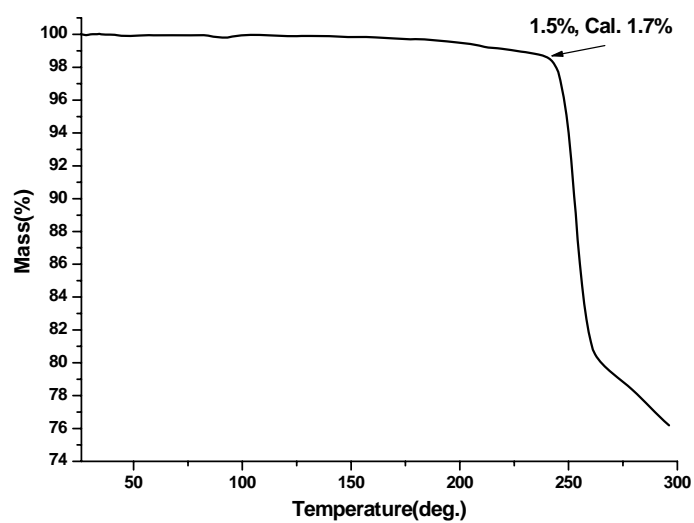

**Figure S4.** TGA curve of complex **1**.

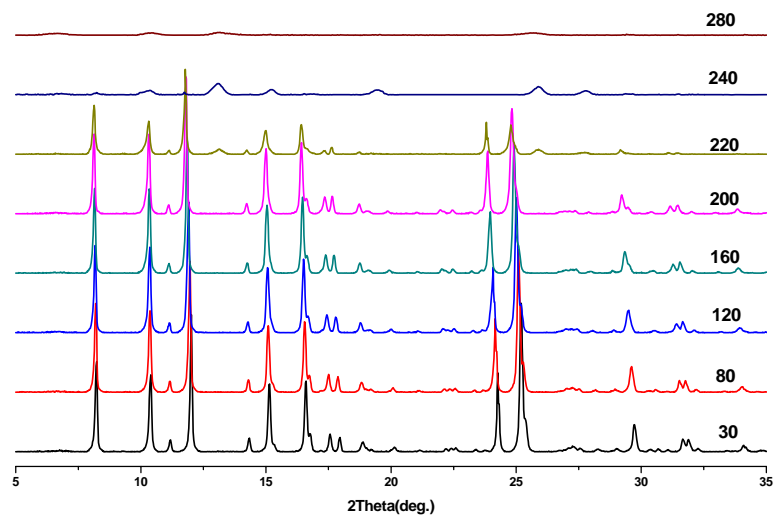

**Figure S5.** Powder XRD patterns of **1** at different temperature.
